# Supplementary material
Source: Royal Society of Chemistry journal article supplement (doi:10.1039/d6cy00451b)
Supplement: d6cy00451b1.pdf [file d6cy00451b1.pdf]

## Supporting Information

### Enhanced catalytic reduction of nitroaromatics by atomically dispersed cobalt catalyst via sulfur doping

Jinna Lu,<sup>†a</sup> Qiong Wu,<sup>†b</sup> Bolin Li,<sup>a</sup> Ye Li,<sup>a</sup> Kaixiong Yang<sup>\*c</sup> and Li Ye<sup>\*a</sup>

<sup>a</sup> Hubei Key Laboratory of Mineral Resources Processing and Environment, School of Resources and Environmental Engineering, Wuhan University of Technology, Wuhan 430070, China

<sup>b</sup> Technical Centre for Soil, Agriculture and Rural Ecology and Environment, Ministry of Ecology and Environment, Beijing 100012, China

<sup>c</sup> China Construction Advanced Technology Research Institute, China Construction Third Engineering Bureau Group Co., Ltd., Wuhan 430075, China

\* Corresponding author: Kaixiong Yang, Li Ye

E-mail: yang\_kaixiong@126.com, yeli1992@whut.edu.cn

† Co-first authorship

Number of pages: 10

Number of figures: 5

Number of tables: 2

## Table of Contents

### Figs:

**S1** Time-dependent UV-vis spectra recorded with and without the addition of NaBH<sub>4</sub> into 4-NP solution.

**S2** Catalytic performance (a) and *k* values (b) of the N-C, Co-N-C, and Co-N-C-S. Reaction conditions: [4-NP] = 0.15 mM, [catalyst loading] = 50 mg·L<sup>-1</sup>, and [NaBH<sub>4</sub>] = 30 mM.

**S3** Catalytic performance of Co-N-C-S catalysts prepared with different thiourea amounts.

**S4** Effects of the catalyst loading (a), NaBH<sub>4</sub> concentration (b), and initial 4-NP concentration (c) on the removal efficiency of 4-NP. Reaction conditions: [4-NP] = 0.15 mM and [NaBH<sub>4</sub>] = 30 mM (a); [4-NP] = 0.15 mM and [catalyst loading] = 50 mg·L<sup>-1</sup> (b); [catalyst loading] = 50 mg·L<sup>-1</sup> and [NaBH<sub>4</sub>] = 30 mM (c).

**S5** XRD patterns of Co-N-C-S before and after six catalytic cycles.

**S6** TEM images of Co-N-C-S before (a) and after (b) six catalytic cycles.

### Tables:

**S1** The fraction of pyridinic N and pyrrolic N in N-C, Co-N-C, and Co-N-C-S.

**S2** Catalytic activities of 4-NP reduction on different metal catalysts.

**S3** The summary of all experimental conditions.

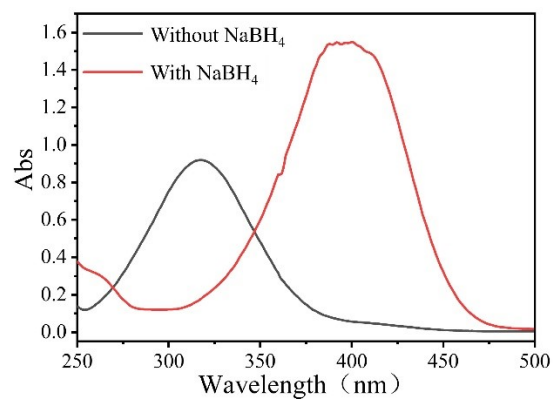

**Fig. S1** Time-dependent UV-vis spectra recorded with and without the addition of NaBH<sub>4</sub> into 4-NP solution.

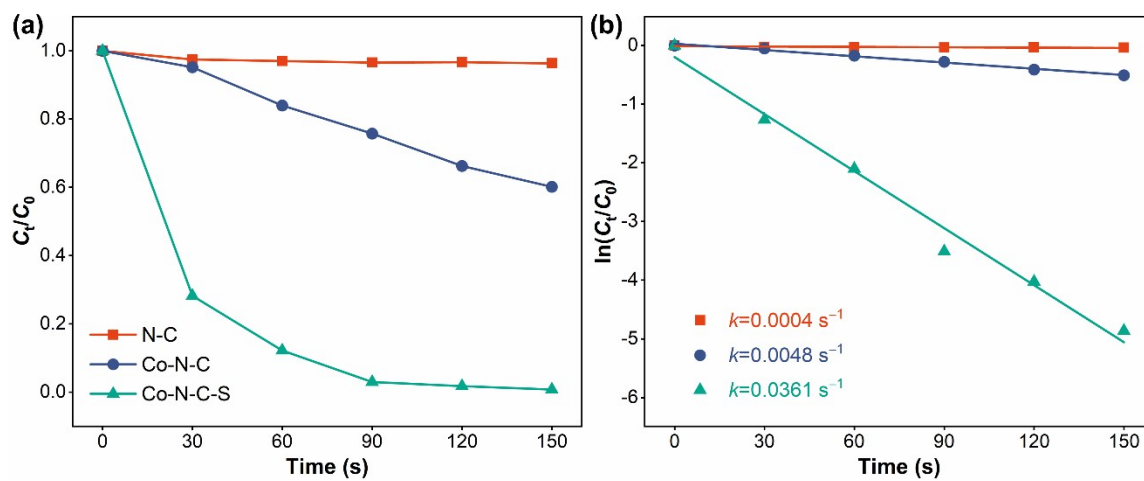

**Fig. S2** Catalytic performance (a) and  $k$  values (b) of the N-C, Co-N-C, and Co-N-C-S. Reaction conditions:  $[4\text{-NP}] = 0.15 \text{ mM}$ ,  $[\text{catalyst loading}] = 50 \text{ mg}\cdot\text{L}^{-1}$ , and  $[\text{NaBH}_4] = 30 \text{ mM}$ .

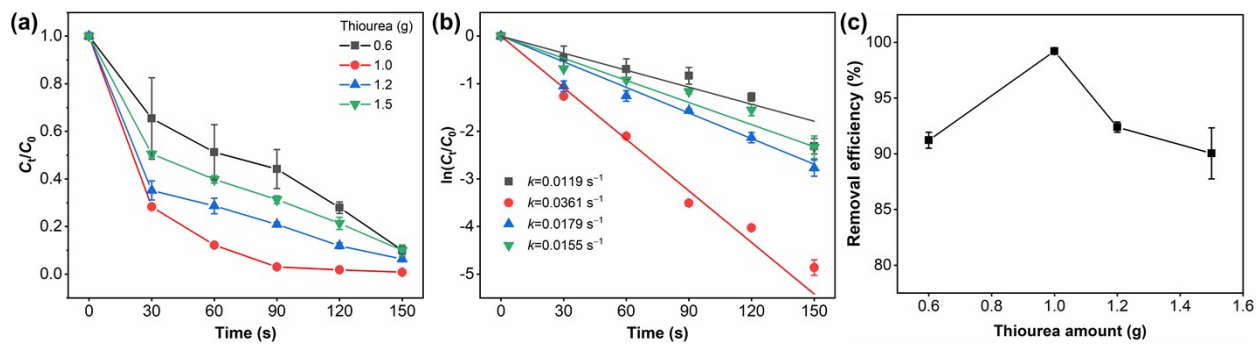

**Fig. S3** Catalytic performance of Co-N-C-S catalysts prepared with different thiourea amounts.

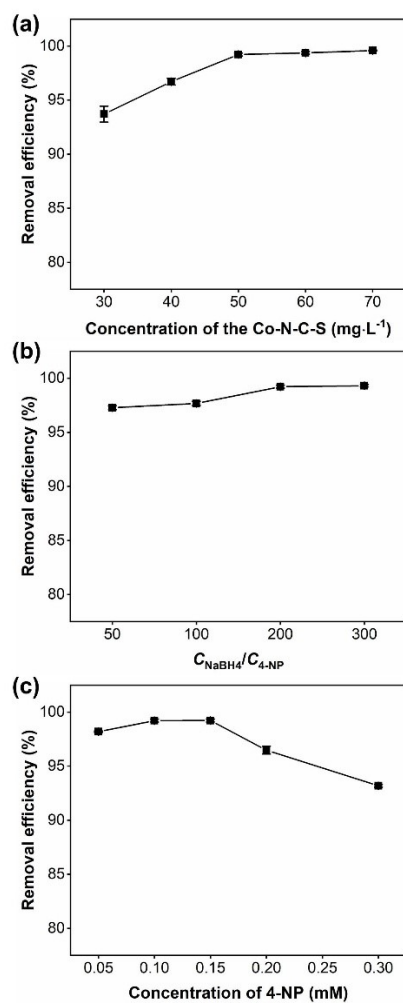

**Fig. S4** Effects of the catalyst loading (a),  $\text{NaBH}_4$  concentration (b), and initial 4-NP concentration (c) on the removal efficiency of 4-NP. Reaction conditions:  $[4\text{-NP}] = 0.15$  mM and  $[\text{NaBH}_4] = 30$  mM (a);  $[4\text{-NP}] = 0.15$  mM and  $[\text{catalyst loading}] = 50$   $\text{mg}\cdot\text{L}^{-1}$  (b);  $[\text{catalyst loading}] = 50$   $\text{mg}\cdot\text{L}^{-1}$  and  $[\text{NaBH}_4] = 30$  mM (c).

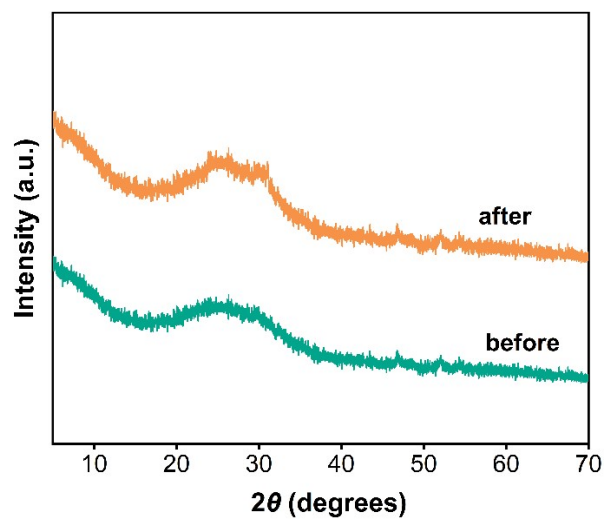

**Fig. S5** XRD patterns of Co-N-C-S before and after six catalytic cycles.

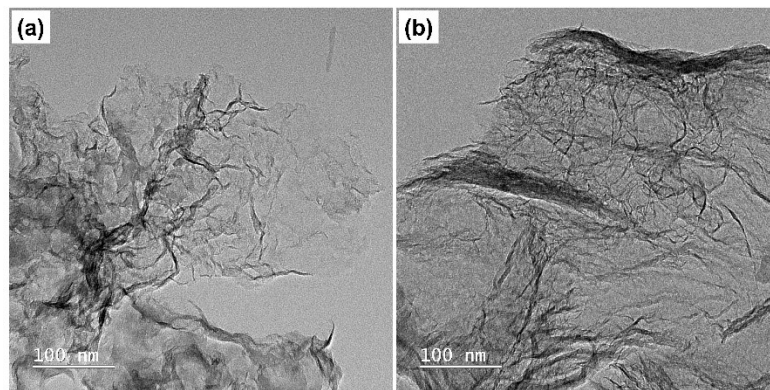

**Fig. S6** TEM images of Co-N-C-S before (a) and after (b) six catalytic cycles.

**Table S1** The fraction of pyridinic N and pyrrolic N in N-C, Co-N-C, and Co-N-C-S.

| Samples  | States      | Fractions (%) |
|----------|-------------|---------------|
| N-C      | Pyridinic N | 16.89         |
|          | Pyrrolic N  | 83.11         |
| Co-N-C   | Pyridinic N | 38.06         |
|          | Pyrrolic N  | 61.94         |
| Co-N-C-S | Pyridinic N | 46.38         |
|          | Pyrrolic N  | 53.62         |

**Table S2** Catalytic activities of 4-NP reduction on different metal catalysts.

| Catalysts                               | Reduction time (s) | $k$ ( $s^{-1}$ ) | nNaBH <sub>4</sub> /n4-NP | Reference        |
|-----------------------------------------|--------------------|------------------|---------------------------|------------------|
| Au/graphene hydrogel                    | 720                | 0.00317          | 1000                      | 1                |
| Au/CeO <sub>2</sub> @ZrO <sub>2</sub>   | 1300               | 0.0241           | 12.3                      | 2                |
| Au@g-C <sub>3</sub> N <sub>4</sub>      | 600                | 0.0150           | 10                        | 3                |
| Ni@Pd/KCC-1                             | 290                | 0.0204           | 833.3                     | 4                |
| Pt-Au-PDA/RGO                           | 180                | 0.00958          | 111.1                     | 5                |
| Au/CB                                   | 360                | 0.0138           | 100, 200, 300, 400        | 6                |
| Ag <sub>x</sub> /C15h                   | 20                 | 0.0125           | 500                       | 7                |
| PDA-g-C <sub>3</sub> N <sub>4</sub> /Au | 60                 | 0.0216           | 50, 100, 200, 300, 400    | 8                |
| Fe <sub>3</sub> O <sub>4</sub> @COF-Au  | 1440               | 0.00370          | 440                       | 9                |
| <b>Co-N-C-S</b>                         | <b>150</b>         | <b>0.0361</b>    | <b>200</b>                | <b>This work</b> |

**Table S3** The summary of all experimental conditions.

| Experiments                                                                       | Reaction conditions          |                                             |                           |
|-----------------------------------------------------------------------------------|------------------------------|---------------------------------------------|---------------------------|
|                                                                                   | [4-NP] (mM)                  | [catalyst loading]<br>(mg·L <sup>-1</sup> ) | [NaBH <sub>4</sub> ] (mM) |
| Comparison of performance among three materials                                   | 0.15                         | 50                                          | 30                        |
| Effects of the catalyst loading on the performance of the Co-N-C-S                | 0.15                         | 30, 40, 50, 60, 70                          | 30                        |
| Effects of the NaBH <sub>4</sub> concentration on the performance of the Co-N-C-S | 0.15                         | 50                                          | 7.5, 15, 30, 45           |
| Effects of the initial 4-NP concentration on the performance of the Co-N-C-S      | 0.05, 0.10, 0.15, 0.20, 0.30 | 50                                          | 30                        |
| Cyclic experiments                                                                | 0.15                         | 50                                          | 30                        |
| Catalytic performance of the Co-N-C-S in different water matrices                 | 0.15                         | 50                                          | 30                        |

## References:

1. J. Li, C.-y. Liu and Y. Liu, Au/graphene hydrogel: synthesis, characterization and its use for catalytic reduction of 4-nitrophenol, *J. Mater. Chem.*, 2012, **22**, 8426-8430.
2. V. Evangelista, B. Acosta, and S. Miridonov, *et al.*, Highly active Au-CeO<sub>2</sub>@ZrO<sub>2</sub> yolk-shell nanoreactors for the reduction of 4-nitrophenol to 4-aminophenol, *Appl. Catal. B*, 2015, **166-167**, 518-528.
3. T. B. Nguyen, C. P. Huang and R.-a. Doong, Enhanced catalytic reduction of nitrophenols by sodium borohydride over highly recyclable Au@graphitic carbon nitride nanocomposites, *Appl. Catal. B*, 2019, **240**, 337-347.
4. Z. Dong, X. Le, and C. Dong, *et al.*, Ni@Pd core-shell nanoparticles modified fibrous silica nanospheres as highly efficient and recoverable catalyst for reduction of 4-nitrophenol and hydrodechlorination of 4-chlorophenol, *Appl. Catal. B*, 2015, **162**, 372-380.
5. W. Ye, J. Yu, and Y. Zhou, *et al.*, Green synthesis of Pt-Au dendrimer-like nanoparticles supported on polydopamine-functionalized graphene and their high performance toward 4-nitrophenol reduction, *Appl. Catal. B*, 2016, **181**, 371-378.
6. L. Qin, H. Yi, and G. Zeng, *et al.*, Hierarchical porous carbon material restricted Au catalyst for highly catalytic reduction of nitroaromatics, *J. Hazard. Mater.*, 2019, **380**, 120864.
7. C.-S. Chen, T.-C. Chen, and K.-L. Chiu, *et al.*, Silver particles deposited onto magnetic carbon nanofibers as highly active catalysts for 4-nitrophenol reduction, *Appl. Catal. B*, 2022, **315**, 121596.
8. L. Qin, D. Huang, and P. Xu, *et al.*, In-situ deposition of gold nanoparticles onto polydopamine-decorated g-C<sub>3</sub>N<sub>4</sub> for highly efficient reduction of nitroaromatics in environmental water purification, *J. Colloid Interface Sci.*, 2019, **534**, 357-369.
9. Y. Xu, X. Shi, and R. Hua, *et al.*, Remarkably catalytic activity in reduction of 4-nitrophenol and methylene blue by Fe<sub>3</sub>O<sub>4</sub>@COF supported noble metal nanoparticles, *Appl. Catal. B*, 2020, **260**, 118142.
